# Supplementary material for: Anti-Gr-1 Antibody Provides Short-Term Depletion of MDSC in Lymphodepleted Mice with Active-Specific Melanoma Therapy
Source: MDPI journal article supplement (doi:10.3390/vaccines10040560), 2022-04-04
Supplement: s1 [file s1]

# Supplementary figures:

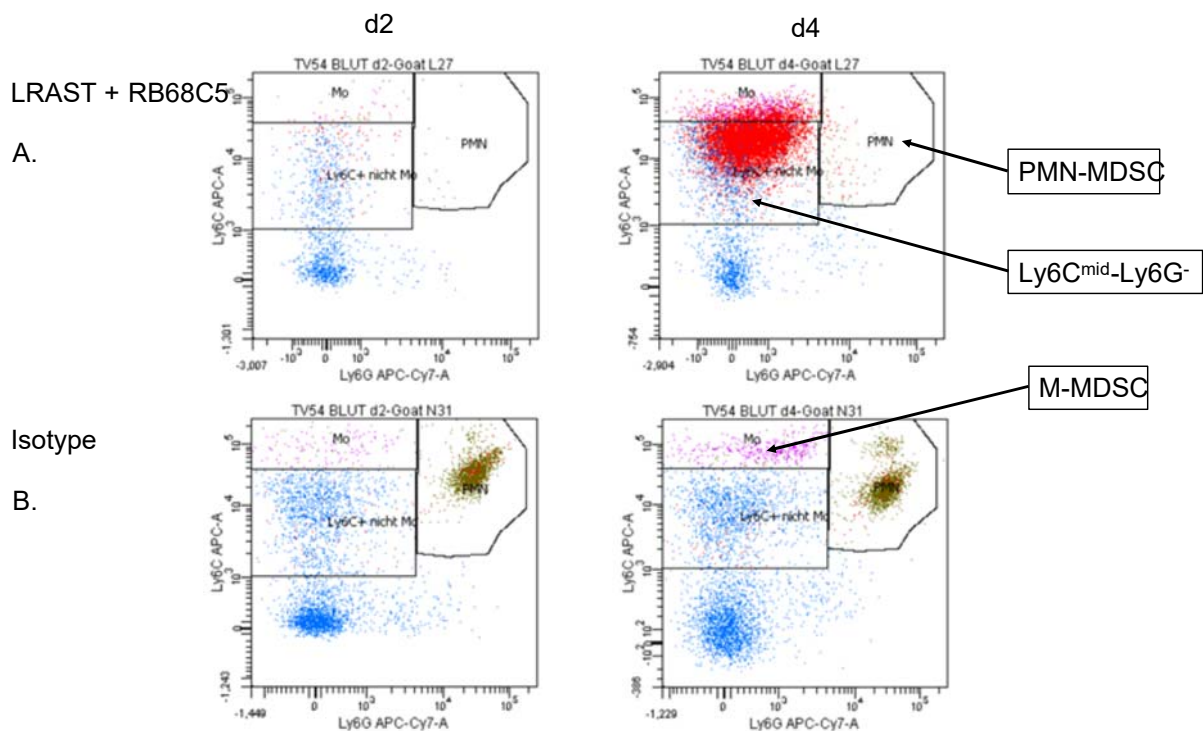

**Figure S1: Recurrence of PMN-MDSC.** Representative dot plots showing PMN-MDSC, M-MDSC and Ly6G<sup>-</sup>Ly6C<sup>mid</sup> cells according to Ly6G/Ly6C-staining of CD45.2<sup>+</sup> CD11b<sup>+</sup> MHCII<sup>-</sup> cells. Cells were analyzed from blood of D5-melanoma carrying mice with LRAST + RB6-8C5 treatment (a), or no treatment (isotype alone, control, b) on day 2 and day 4 after treatment initiation. Red dots represent RB6-8C5-bound cells, as indicated by secondary antibody staining (PE-conjugated goat anti-rat IgG).

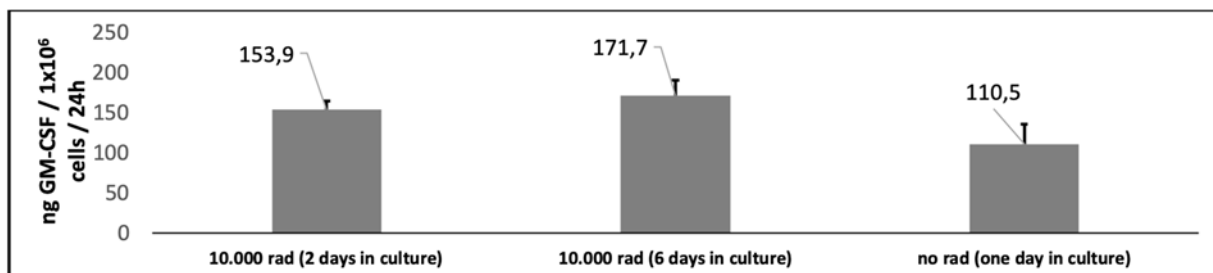

**Figure S2: In vitro GM-CSF production of D5G6 cells.** We confirmed durable GM-CSF secretion of D5G6 cells after irradiation with 10.000 rad compared to non-irradiated D5G6 cells. Cells were kept in culture for a maximum of 6 days. GM-CSF production was evaluated with GM-CSF-ELISA and normalized to 1x10<sup>6</sup> cells and 24 hours.

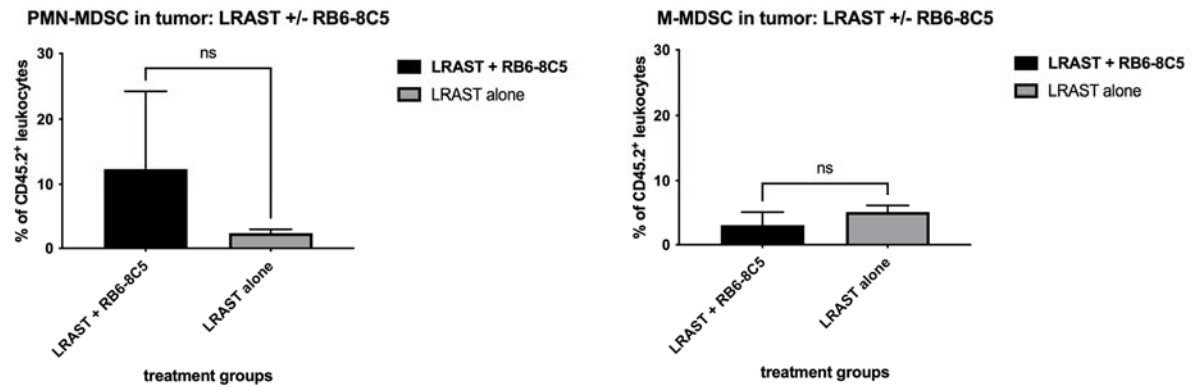

**Figure S3: Tumor-infiltrating PMN- and M-MDSC after LRAST +/- RB6-8C5.** Flow cytometric analysis of D5-tumor tissue reveals PMN- (left) and M-MDSC (right) as % of CD45.2<sup>+</sup> leukocytes from mice treated with LRAST + RB6-8C5 ( $n = 4$ ) or LRAST alone ( $n = 3$ ). Mice were euthanized and tumors harvested for FACS-analysis (LRAST + RB6-8C5: 26/29/35 and 37 days after treatment initiation; LRAST alone: 29/32 days after treatment initiation). Bars indicate means with SD. For statistics Student's t-test was performed.
